# Supplementary material for: Involvement of Abscisic Acid in Transition of Pea (Pisum sativum L.) Seeds from Germination to Post-Germination Stages
Source: MDPI journal article supplement (doi:10.3390/plants13020206), 2024-01-11
Supplement: s1 [file s1]

## Supplementary Figures

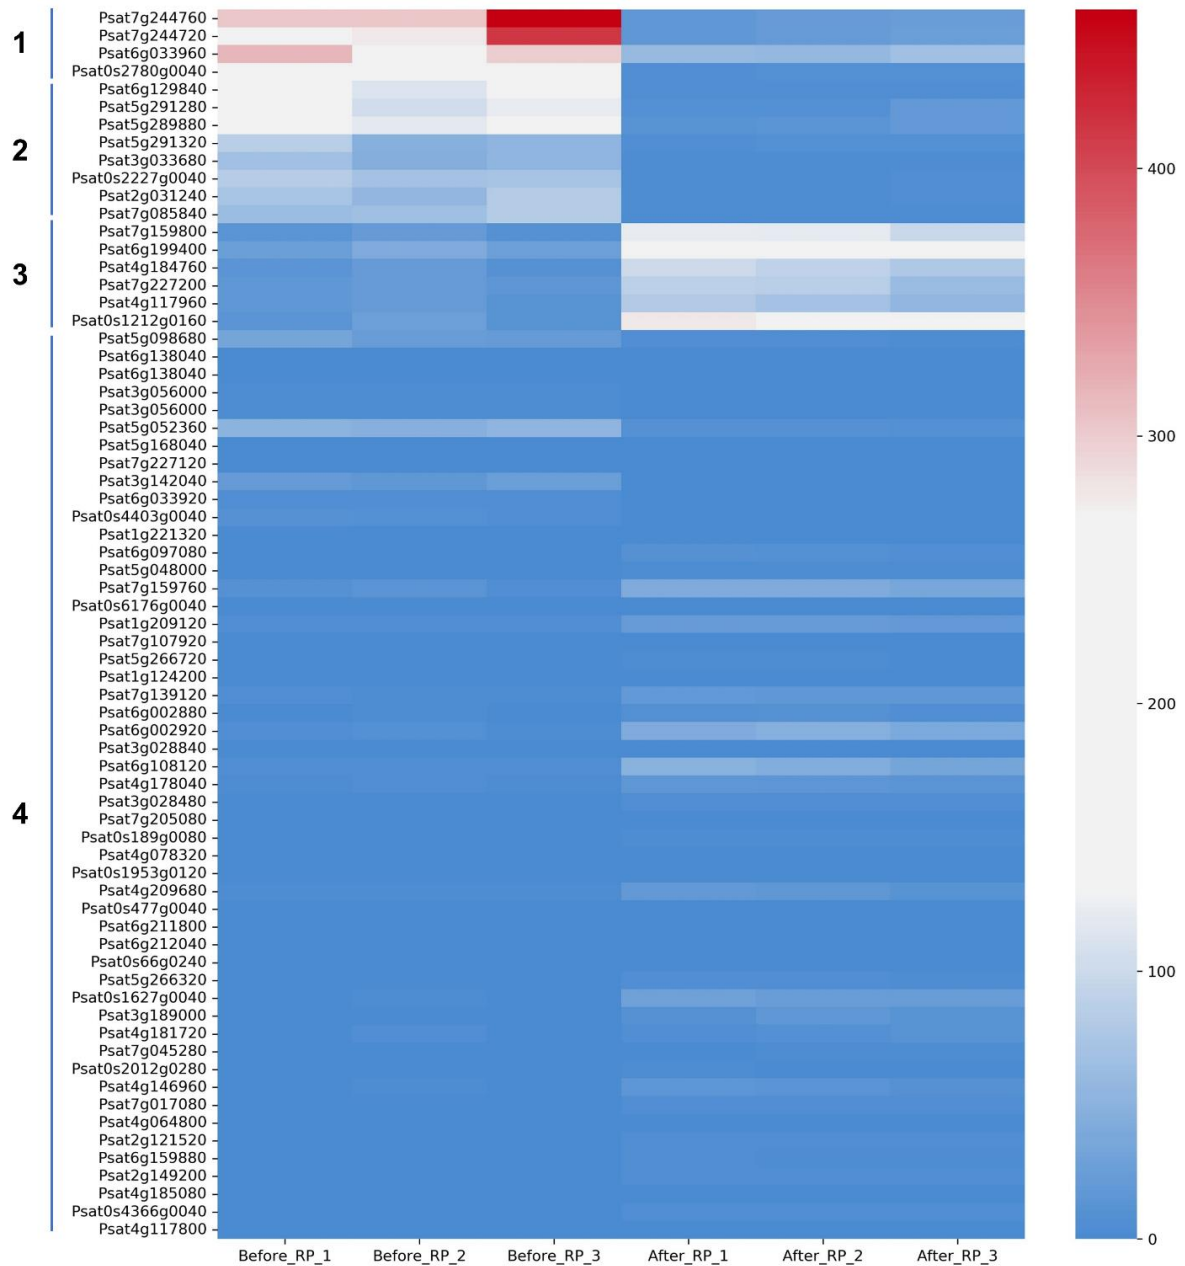

**Figure S1.** Expression heatmap of ABA-associated DEGs in embryonic axes of *P. sativum* before and after radicle protrusion (RP). The red and blue color denotes high and low values of RPKM-normalized gene expression, respectively. The red-white-blue gradient represents the change of values from high to low. 1-4 – clusters of genes with similar expression behavior (obtained using k-means algorithm.)

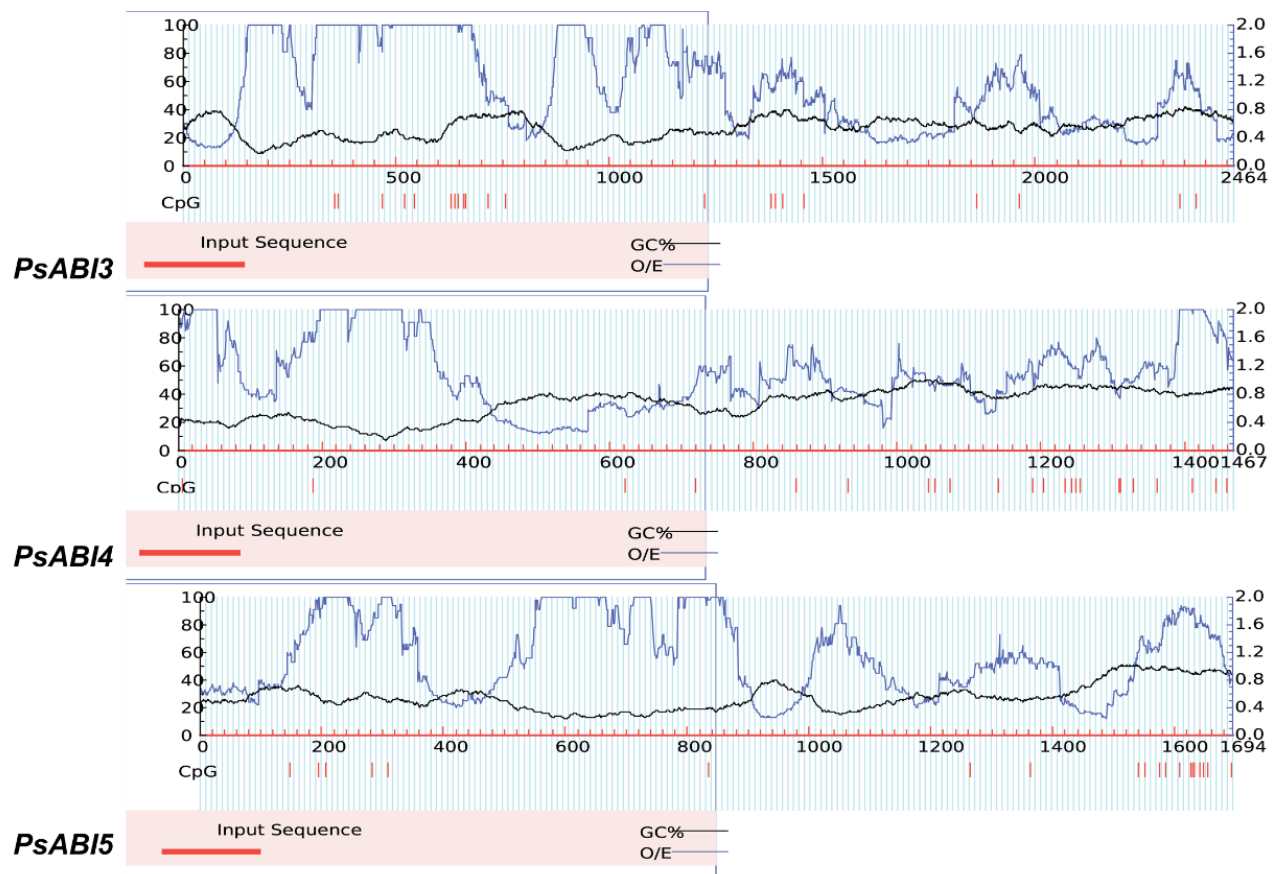

**Figure S2.** Predicted methylation sites for CpG motifs in the sequences of the seed resistance to dehydration genes in the *P. sativum* genome. CpG sites are marked with red vertical lines. GC% – black line. O / E – blue line.

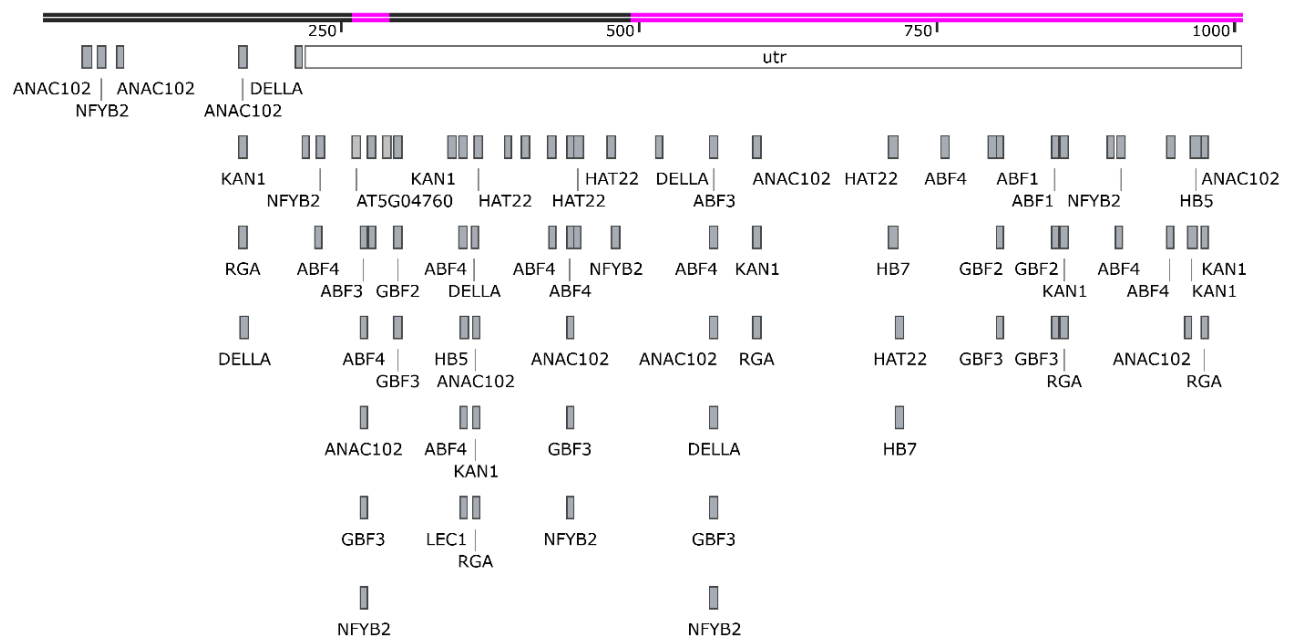

**Figure S3.** Mapping of the *PsABI3* gene promoter.

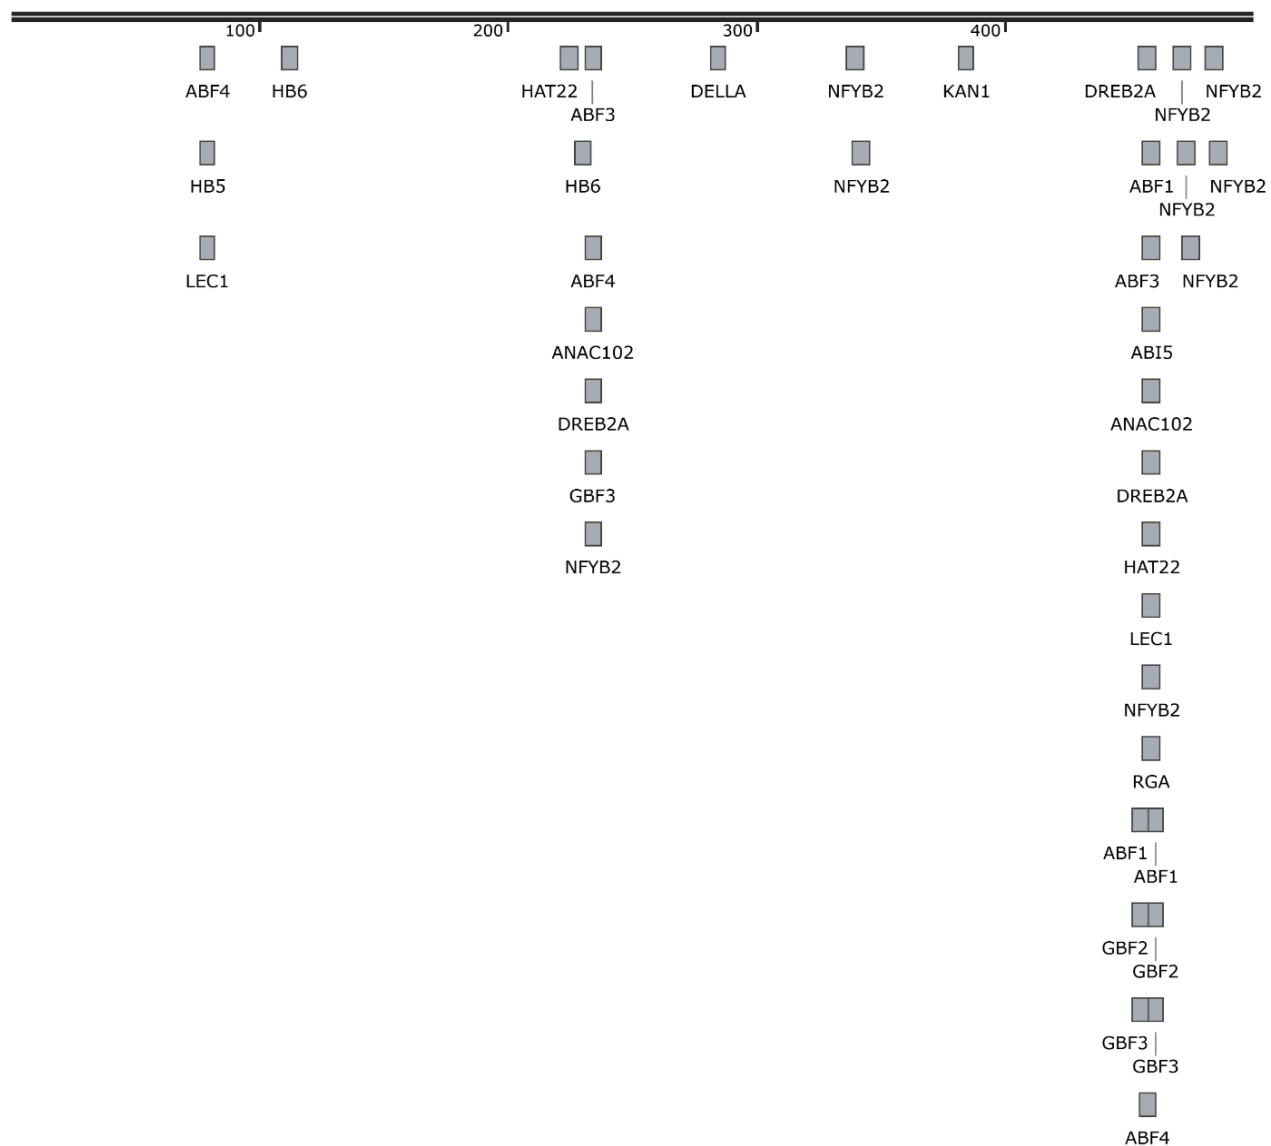

**Figure S4.** Mapping of the *PsABI4* gene promoter.
