# Supplementary material for: Involvement of Abscisic Acid in Transition of Pea (Pisum sativum L.) Seeds from Germination to Post-Germination Stages
Source: Plants (Basel). 2024 Jan 11;13(2):206. doi: 10.3390/plants13020206 (PMC10819913; doi:10.3390/plants13020206)
Supplement: Supplementary file 1 [file plants-13-00206-s001.zip › Supplement_Tables S1-S4.xlsx]

## Sheet: Description
Table S1. Annotation of the ABA-associated genes in the transcriptome of P.sativum embryonic axes.
Table S2. The ABA-dependent genes of P. sativum seeds selected for analysis of DNA methylation in the promoters.
Table S3. Primers used for amplification of gene promoter regions from bisulfite-treated DNA isolated from embryonic axes of P.sativum.
Table S4. Functions of transcription factors, binding sites of which were identified in gene promoter regions PsABI3, PsABI4 и PsABI5.

## Sheet: Table S1
	Table S1. Annotation of the ABA-associated genes in the transcriptome of P.sativum embryonic axes.
	Genes are arranged in decreasing order of Fold change
	Gene ID: gene identifier from Ensembl BioMart tool https://plants.ensembl.org/info/about/index.html (for Pisum sativum)
	Fold Change (after RP): Logarythmic value of expression values change in embryonic axes after radicle protrusion
	LogFC (after RP): Logarythmic value of expression values change in embryonic axes after radicle protrusion
	FDR: False discovery rate
	GO term accesion: Gene ontology term identifier
	InterPro: Classification of protein families with their functional analysis
	Arabidopsis ID: gene identifier from Arabidopsis thaliana TAIR10 genome annotation, as presented in EnsemblPlants database
№	Gene ID	Arabidopsis ID	Arabidopsis Name	Fold Change (after RP)	LogFC (after RP)	FDR	InterPro ID	InterPro Short Description	InterPro Description	GO term accesion	GO term name	Fold Change (after RP)	LogFC (after RP)	FDR
	Down-regulated Genes
1	Psat7g085840	AT1G48130	PER1	29.4076	-4.87812	2.77551e-06	IPR000866,IPR013766,IPR019479,IPR024706,IPR036249,IPR045020	AhpC/TSA,Thioredoxin_domain,Peroxiredoxin_C,Peroxiredoxin_AhpC-typ,Thioredoxin-like_sf,PRX_1cys	Alkyl hydroperoxide reductase subunit C/ Thiol specific antioxidant,Thioredoxin domain,Peroxiredoxin, C-terminal,Peroxiredoxin, AhpC-type,Thioredoxin-like superfamily,1-Cys peroxiredoxin	GO:0016491,GO:0016209,GO:0051920,GO:0098869	oxidoreductase activity,antioxidant activity,peroxiredoxin activity,cellular oxidant detoxification	29.4076	-4.87812	2.77551e-06
2	Psat6g129840	AT5G55240,AT4G26740	ATPXG2,ATS1	27.748	-4.79431	4.08062e-06	IPR007736	Caleosin-related	Caleosin-related			27.748	-4.79431	4.08062e-06
3	Psat0s2780g0040	AT3G51810	EM1	22.7355	-4.50688	1.23381e-05	IPR000389,IPR022377,IPR038956	Small_hydrophilic_seed_prot,Sm_Hydphi_plant_seed_CS,LEA_5	Small hydrophilic plant seed protein,Small hydrophilic plant seed protein, conserved site,Late embryogenesis abundant protein, LEA_5 subgroup			22.7355	-4.50688	1.23381e-05
4	Psat3g033680	AT2G36270	ABI5	22.1951	-4.47217	5.32045e-06	IPR004827,IPR043452	bZIP,BZIP46-like	Basic-leucine zipper domain,Plant bZIP transcription factors	GO:0003700,GO:0006355,GO:0045893,GO:0005634,GO:0042803,GO:0009738,GO:0043565,GO:0009409,GO:0009414,GO:0009651,GO:0009737,GO:0009845,GO:0010152,GO:0090351	DNA-binding transcription factor activity,regulation of DNA-templated transcription,positive regulation of DNA-templated transcription,nucleus,protein homodimerization activity,abscisic acid-activated signaling pathway,sequence-specific DNA binding,response to cold,response to water deprivation,response to salt stress,response to abscisic acid,seed germination,pollen maturation,seedling developme…	22.1951	-4.47217	5.32045e-06
5	Psat3g142040	AT3G24650	ABI3	21.2334	-4.40826	4.92352e-06	IPR003340,IPR015300,IPR044800	B3_DNA-bd,DNA-bd_pseudobarrel_sf,LEC2-like	B3 DNA binding domain,DNA-binding pseudobarrel domain superfamily,B3 domain-containing transcription factor LEC2-like	GO:0003700,GO:0005634,GO:0003677,GO:0043565,GO:0009657,GO:0009733,GO:0009737,GO:0009793,GO:0031930,GO:0045893,GO:0005829	DNA-binding transcription factor activity,nucleus,DNA binding,sequence-specific DNA binding,plastid organization,response to auxin,response to abscisic acid,embryo development ending in seed dormancy,mitochondria-nucleus signaling pathway,positive regulation of DNA-templated transcription,cytosol	21.2334	-4.40826	4.92352e-06
6	Psat2g031240	AT2G40220	ABI4	21.2265	-4.4078	6.6118e-06	IPR001471,IPR016177,IPR036955	AP2/ERF_dom,DNA-bd_dom_sf,AP2/ERF_dom_sf	AP2/ERF domain,DNA-binding domain superfamily,AP2/ERF domain superfamily	GO:0003700,GO:0003677,GO:0006355,GO:0005634	DNA-binding transcription factor activity,DNA binding,regulation of DNA-templated transcription,nucleus	21.2265	-4.4078	6.6118e-06
7	Psat0s2227g0040	AT5G52300,AT4G25580	LTI65,AT4G25580	19.7993	-4.30738	2.56536e-06	IPR012418,IPR037491	CAP160,LTI78/LTI65	CAP160,Low-temperature-induced 78kDa/65kDa	GO:0009737	response to abscisic acid	19.7993	-4.30738	2.56536e-06
8	Psat3g056000	AT1G03880,AT1G03890,AT5G44120,AT4G28520	CRU2,AT1G03890,CRA1,CRU3	17.2635	-4.10965	5.37825e-06	IPR006044,IPR006045,IPR011051,IPR014710	11S_seedstore_pln,Cupin_1,RmlC_Cupin_sf,RmlC-like_jellyroll	11-S seed storage protein, plant,Cupin 1,RmlC-like cupin domain superfamily,RmlC-like jelly roll fold	GO:0045735	nutrient reservoir activity	17.2635	-4.10965	5.37825e-06
9	Psat3g056000	AT1G03880,AT1G03890,AT5G44120,AT4G28520	CRU2,AT1G03890,CRA1,CRU3	17.2635	-4.10965	5.37825e-06	IPR006044,IPR006045,IPR011051,IPR014710	11S_seedstore_pln,Cupin_1,RmlC_Cupin_sf,RmlC-like_jellyroll	11-S seed storage protein, plant,Cupin 1,RmlC-like cupin domain superfamily,RmlC-like jelly roll fold	GO:0045735	nutrient reservoir activity	17.2635	-4.10965	5.37825e-06
10	Psat7g227120	AT5G59310,AT3G51600,AT2G38530,AT2G15050,AT5G59320,AT2G38540,AT3G51590	LTP4,LTP5,LTP2,LTP,LTP3,LP1,LTP12	16.9589	-4.08397	0.000891239	IPR000528,IPR016140,IPR036312	Plant_nsLTP,Bifunc_inhib/LTP/seed_store,Bifun_inhib/LTP/seed_sf	Plant non-specific lipid-transfer protein/Par allergen,Bifunctional inhibitor/plant lipid transfer protein/seed storage helical domain,Bifunctional inhibitor/plant lipid transfer protein/seed storage helical domain superfamily	GO:0008289,GO:0006869	lipid binding,lipid transport	16.9589	-4.08397	0.000891239
11	Psat7g244760	AT2G40170	GEA6	16.761	-4.06704	8.9431e-06	IPR000389,IPR022377,IPR038956	Small_hydrophilic_seed_prot,Sm_Hydphi_plant_seed_CS,LEA_5	Small hydrophilic plant seed protein,Small hydrophilic plant seed protein, conserved site,Late embryogenesis abundant protein, LEA_5 subgroup			16.761	-4.06704	8.9431e-06
12	Psat7g244720	AT2G40170	GEA6	14.3494	-3.84291	1.62528e-05	IPR000389,IPR022377,IPR038956	Small_hydrophilic_seed_prot,Sm_Hydphi_plant_seed_CS,LEA_5	Small hydrophilic plant seed protein,Small hydrophilic plant seed protein, conserved site,Late embryogenesis abundant protein, LEA_5 subgroup			14.3494	-3.84291	1.62528e-05
13	Psat5g291280			11.4653	-3.5192	0.000172695	IPR000907,IPR001024,IPR001246,IPR013819,IPR020833,IPR027433,IPR036226,IPR036392,IPR042057	LipOase,PLAT/LH2_dom,LipOase_plant,LipOase_C,LipOase_Fe_BS,Lipoxygenase_dom_3,LipOase_C_sf,PLAT/LH2_dom_sf,Lipoxy_PLAT/LH2	Lipoxygenase,PLAT/LH2 domain,Lipoxygenase, plant,Lipoxygenase, C-terminal,Lipoxygenase, iron binding site,Lipoxygenase, domain 3,Lipoxigenase, C-terminal domain superfamily,PLAT/LH2 domain superfamily,Plant lipoxygenase, PLAT/LH2 domain	GO:0046872,GO:0016702,GO:0016491,GO:0005515,GO:0005737,GO:0006629,GO:0006631,GO:0006633,GO:0051213,GO:1990136,GO:0031408,GO:0034440	metal ion binding,oxidoreductase activity, acting on single donors with incorporation of molecular oxygen, incorporation of two atoms of oxygen,oxidoreductase activity,protein binding,cytoplasm,lipid metabolic process,fatty acid metabolic process,fatty acid biosynthetic process,dioxygenase activity,linoleate 9S-lipoxygenase activity,oxylipin biosynthetic process,lipid oxidation	11.4653	-3.5192	0.000172695
14	Psat5g289880			10.135	-3.34127	3.33483e-05	IPR000907,IPR001024,IPR001246,IPR013819,IPR020833,IPR020834,IPR027433,IPR036226,IPR036392,IPR042057	LipOase,PLAT/LH2_dom,LipOase_plant,LipOase_C,LipOase_Fe_BS,LipOase_CS,Lipoxygenase_dom_3,LipOase_C_sf,PLAT/LH2_dom_sf,Lipoxy_PLAT/LH2	Lipoxygenase,PLAT/LH2 domain,Lipoxygenase, plant,Lipoxygenase, C-terminal,Lipoxygenase, iron binding site,Lipoxygenase, conserved site,Lipoxygenase, domain 3,Lipoxigenase, C-terminal domain superfamily,PLAT/LH2 domain superfamily,Plant lipoxygenase, PLAT/LH2 domain	GO:0046872,GO:0016702,GO:0016491,GO:0005515,GO:0005737,GO:0006629,GO:0006631,GO:0006633,GO:0051213,GO:1990136,GO:0031408,GO:0034440	metal ion binding,oxidoreductase activity, acting on single donors with incorporation of molecular oxygen, incorporation of two atoms of oxygen,oxidoreductase activity,protein binding,cytoplasm,lipid metabolic process,fatty acid metabolic process,fatty acid biosynthetic process,dioxygenase activity,linoleate 9S-lipoxygenase activity,oxylipin biosynthetic process,lipid oxidation	10.135	-3.34127	3.33483e-05
15	Psat5g289880			10.135	-3.34127	3.33483e-05	IPR000907,IPR001024,IPR001246,IPR013819,IPR020833,IPR020834,IPR027433,IPR036226,IPR036392,IPR042057	LipOase,PLAT/LH2_dom,LipOase_plant,LipOase_C,LipOase_Fe_BS,LipOase_CS,Lipoxygenase_dom_3,LipOase_C_sf,PLAT/LH2_dom_sf,Lipoxy_PLAT/LH2	Lipoxygenase,PLAT/LH2 domain,Lipoxygenase, plant,Lipoxygenase, C-terminal,Lipoxygenase, iron binding site,Lipoxygenase, conserved site,Lipoxygenase, domain 3,Lipoxigenase, C-terminal domain superfamily,PLAT/LH2 domain superfamily,Plant lipoxygenase, PLAT/LH2 domain	GO:0046872,GO:0016702,GO:0016491,GO:0005515,GO:0005737,GO:0006629,GO:0006631,GO:0006633,GO:0051213,GO:1990136,GO:0031408,GO:0034440	metal ion binding,oxidoreductase activity, acting on single donors with incorporation of molecular oxygen, incorporation of two atoms of oxygen,oxidoreductase activity,protein binding,cytoplasm,lipid metabolic process,fatty acid metabolic process,fatty acid biosynthetic process,dioxygenase activity,linoleate 9S-lipoxygenase activity,oxylipin biosynthetic process,lipid oxidation	10.135	-3.34127	3.33483e-05
16	Psat0s4403g0040			9.31626	-3.21975	0.000222657	IPR004873,IPR044816	BURP_dom,BURP	BURP domain,BURP domain-containing protein			9.31626	-3.21975	0.000222657
17	Psat5g291320			7.6483	-2.93514	4.82799e-05	IPR000907,IPR013819,IPR036226	LipOase,LipOase_C,LipOase_C_sf	Lipoxygenase,Lipoxygenase, C-terminal,Lipoxigenase, C-terminal domain superfamily	GO:0046872,GO:0016702,GO:0034440	metal ion binding,oxidoreductase activity, acting on single donors with incorporation of molecular oxygen, incorporation of two atoms of oxygen,lipid oxidation	7.6483	-2.93514	4.82799e-05
18	Psat6g138040	AT1G03880,AT1G03890,AT5G44120,AT4G28520	CRU2,AT1G03890,CRA1,CRU3	6.94769	-2.79653	0.000426162	IPR006044,IPR006045,IPR011051,IPR014710,IPR022379	11S_seedstore_pln,Cupin_1,RmlC_Cupin_sf,RmlC-like_jellyroll,11S_seedstore_CS	11-S seed storage protein, plant,Cupin 1,RmlC-like cupin domain superfamily,RmlC-like jelly roll fold,11-S seed storage protein, conserved site	GO:0045735	nutrient reservoir activity	6.94769	-2.79653	0.000426162
19	Psat6g138040	AT1G03880,AT1G03890,AT5G44120,AT4G28520	CRU2,AT1G03890,CRA1,CRU3	6.94769	-2.79653	0.000426162	IPR006044,IPR006045,IPR011051,IPR014710,IPR022379	11S_seedstore_pln,Cupin_1,RmlC_Cupin_sf,RmlC-like_jellyroll,11S_seedstore_CS	11-S seed storage protein, plant,Cupin 1,RmlC-like cupin domain superfamily,RmlC-like jelly roll fold,11-S seed storage protein, conserved site	GO:0045735	nutrient reservoir activity	6.94769	-2.79653	0.000426162
20	Psat5g098680	AT2G31985,AT1G05510	AT2G31985,AT1G05510	6.91239	-2.78919	3.6018e-05	IPR010686	OBAP-like	Oil body-associated protein-like			6.91239	-2.78919	3.6018e-05
21	Psat5g168040			5.59322	-2.48368	0.00177755	IPR000484,IPR000685,IPR033966,IPR036376,IPR036854	Photo_RC_L/M,RuBisCO_lsu_C,RuBisCO,RuBisCO_lsu_C_sf,Photo_II_D1/D2_sf	Photosynthetic reaction centre, L/M,Ribulose bisphosphate carboxylase, large subunit, C-terminal,RuBisCO,Ribulose bisphosphate carboxylase, large subunit, C-terminal domain superfamily,Photosystem II protein D1/D2 superfamily	GO:0000287,GO:0045156,GO:0009772,GO:0019684,GO:0016984	magnesium ion binding,electron transporter, transferring electrons within the cyclic electron transport pathway of photosynthesis activity,photosynthetic electron transport in photosystem II,photosynthesis, light reaction,ribulose-bisphosphate carboxylase activity	5.59322	-2.48368	0.00177755
22	Psat5g052360	AT5G50720,AT4G24960	HVA22E,HVA22D	5.11577	-2.35495	7.07523e-06	IPR004345	TB2_DP1_HVA22	TB2/DP1/HVA22-related protein			5.11577	-2.35495	7.07523e-06
23	Psat6g033920	AT5G25610	RD22	4.90261	-2.29355	6.6118e-06	IPR004873,IPR044816	BURP_dom,BURP	BURP domain,BURP domain-containing protein			4.90261	-2.29355	6.6118e-06
24	Psat6g033960	AT5G25610	RD22	4.34863	-2.12056	1.10947e-05	IPR004873,IPR044816	BURP_dom,BURP	BURP domain,BURP domain-containing protein			4.34863	-2.12056	1.10947e-05
	Up-regulated Genes
25	Psat1g124200	AT1G17950,AT1G73410	MYB52,MYB54	18.2145	4.18701	0.000581396	IPR001005,IPR009057,IPR017930	SANT/Myb,Homeobox-like_sf,Myb_dom	SANT/Myb domain,Homeobox-like domain superfamily,Myb domain			18.2145	4.18701	0.000581396
26	Psat0s1627g0040			16.9325	4.08172	2.46967e-05	IPR001005,IPR009057,IPR017930	SANT/Myb,Homeobox-like_sf,Myb_dom	SANT/Myb domain,Homeobox-like domain superfamily,Myb domain			16.9325	4.08172	2.46967e-05
27	Psat5g266720	AT4G28110	MYB41	16.1694	4.0152	0.000253538	IPR001005,IPR009057,IPR017930	SANT/Myb,Homeobox-like_sf,Myb_dom	SANT/Myb domain,Homeobox-like domain superfamily,Myb domain			16.1694	4.0152	0.000253538
28	Psat0s1212g0160			13.2049	3.723	0.000176891	IPR000907,IPR001024,IPR001246,IPR013819,IPR020833,IPR020834,IPR027433,IPR036226,IPR036392,IPR042057	LipOase,PLAT/LH2_dom,LipOase_plant,LipOase_C,LipOase_Fe_BS,LipOase_CS,Lipoxygenase_dom_3,LipOase_C_sf,PLAT/LH2_dom_sf,Lipoxy_PLAT/LH2	Lipoxygenase,PLAT/LH2 domain,Lipoxygenase, plant,Lipoxygenase, C-terminal,Lipoxygenase, iron binding site,Lipoxygenase, conserved site,Lipoxygenase, domain 3,Lipoxigenase, C-terminal domain superfamily,PLAT/LH2 domain superfamily,Plant lipoxygenase, PLAT/LH2 domain	GO:0046872,GO:0016702,GO:0016491,GO:0005515,GO:0034440	metal ion binding,oxidoreductase activity, acting on single donors with incorporation of molecular oxygen, incorporation of two atoms of oxygen,oxidoreductase activity,protein binding,lipid oxidation	13.2049	3.723	0.000176891
29	Psat3g028480			10.5646	3.40117	2.64144e-05	IPR001356,IPR006563,IPR008422,IPR009057	Homeobox_dom,POX_dom,Homeobox_KN_domain,Homeobox-like_sf	Homeobox domain,POX domain,Homeobox KN domain,Homeobox-like domain superfamily	GO:0003677,GO:0006355	DNA binding,regulation of DNA-templated transcription	10.5646	3.40117	2.64144e-05
30	Psat7g045280			10.1735	3.34674	6.74905e-05	IPR004873,IPR044816	BURP_dom,BURP	BURP domain,BURP domain-containing protein			10.1735	3.34674	6.74905e-05
31	Psat4g064800			10.0629	3.33097	3.64769e-05	IPR005202	TF_GRAS	Transcription factor GRAS			10.0629	3.33097	3.64769e-05
32	Psat0s477g0040			9.99167	3.32073	8.11923e-05	IPR000182,IPR016181	GNAT_dom,Acyl_CoA_acyltransferase	GNAT domain,Acyl-CoA N-acyltransferase	GO:0016747	acyltransferase activity, transferring groups other than amino-acyl groups	9.99167	3.32073	8.11923e-05
33	Psat2g149200			9.42271	3.23614	1.24624e-05	IPR000907,IPR001024,IPR001246,IPR013819,IPR020833,IPR020834,IPR027433,IPR036226,IPR036392	LipOase,PLAT/LH2_dom,LipOase_plant,LipOase_C,LipOase_Fe_BS,LipOase_CS,Lipoxygenase_dom_3,LipOase_C_sf,PLAT/LH2_dom_sf	Lipoxygenase,PLAT/LH2 domain,Lipoxygenase, plant,Lipoxygenase, C-terminal,Lipoxygenase, iron binding site,Lipoxygenase, conserved site,Lipoxygenase, domain 3,Lipoxigenase, C-terminal domain superfamily,PLAT/LH2 domain superfamily	GO:0046872,GO:0016702,GO:0016491,GO:0005515,GO:0034440	metal ion binding,oxidoreductase activity, acting on single donors with incorporation of molecular oxygen, incorporation of two atoms of oxygen,oxidoreductase activity,protein binding,lipid oxidation	9.42271	3.23614	1.24624e-05
34	Psat4g146960	AT2G38750	ANNAT4	8.88143	3.15079	2.63119e-05	IPR001464,IPR018502,IPR037104	Annexin,Annexin_repeat,Annexin_sf	Annexin,Annexin repeat,Annexin superfamily	GO:0005509,GO:0005544	calcium ion binding,calcium-dependent phospholipid binding	8.88143	3.15079	2.63119e-05
35	Psat7g107920			8.75439	3.13001	0.000857194	IPR001005,IPR009057,IPR017930	SANT/Myb,Homeobox-like_sf,Myb_dom	SANT/Myb domain,Homeobox-like domain superfamily,Myb domain			8.75439	3.13001	0.000857194
36	Psat6g002920	AT1G75750,AT2G18420	GASA1,AT2G18420	8.64999	3.1127	0.000109081	IPR003854	GASA	Gibberellin regulated protein			8.64999	3.1127	0.000109081
37	Psat5g266320	AT3G22057	AT3G22057	8.53267	3.093	7.42608e-05	IPR002902,IPR038408	GNK2,GNK2_sf	Gnk2-homologous domain,Gnk2-homologous domain superfamily			8.53267	3.093	7.42608e-05
38	Psat3g189000			8.41258	3.07255	3.3214e-05	IPR004873,IPR044816	BURP_dom,BURP	BURP domain,BURP domain-containing protein			8.41258	3.07255	3.3214e-05
39	Psat6g212040	AT4G21410,AT4G00960,AT4G00970,AT4G21400	CRK29,AT4G00960,CRK41,CRK28	8.22873	3.04067	0.000201356	IPR000719,IPR001245,IPR008271,IPR011009,IPR017441,IPR002902,IPR038408	Prot_kinase_dom,Ser-Thr/Tyr_kinase_cat_dom,Ser/Thr_kinase_AS,Kinase-like_dom_sf,Protein_kinase_ATP_BS,GNK2,GNK2_sf	Protein kinase domain,Serine-threonine/tyrosine-protein kinase, catalytic domain,Serine/threonine-protein kinase, active site,Protein kinase-like domain superfamily,Protein kinase, ATP binding site,Gnk2-homologous domain,Gnk2-homologous domain superfamily	GO:0004672,GO:0005524,GO:0006468	protein kinase activity,ATP binding,protein phosphorylation	8.22873	3.04067	0.000201356
40	Psat7g159800			7.92204	2.98587	7.10755e-05	IPR001005,IPR009057,IPR017930	SANT/Myb,Homeobox-like_sf,Myb_dom	SANT/Myb domain,Homeobox-like domain superfamily,Myb domain			7.92204	2.98587	7.10755e-05
41	Psat2g121520	AT1G69690	TCP15	7.87839	2.9779	1.20176e-05	IPR005333,IPR017887	Transcription_factor_TCP,TF_TCP_subgr	Transcription factor, TCP,Transcription factor TCP subgroup	GO:0003700	DNA-binding transcription factor activity	7.87839	2.9779	1.20176e-05
42	Psat4g185080			7.8687	2.97612	0.000208219	IPR000907,IPR001024,IPR001246,IPR013819,IPR020833,IPR020834,IPR027433,IPR036226,IPR036392,IPR042057	LipOase,PLAT/LH2_dom,LipOase_plant,LipOase_C,LipOase_Fe_BS,LipOase_CS,Lipoxygenase_dom_3,LipOase_C_sf,PLAT/LH2_dom_sf,Lipoxy_PLAT/LH2	Lipoxygenase,PLAT/LH2 domain,Lipoxygenase, plant,Lipoxygenase, C-terminal,Lipoxygenase, iron binding site,Lipoxygenase, conserved site,Lipoxygenase, domain 3,Lipoxigenase, C-terminal domain superfamily,PLAT/LH2 domain superfamily,Plant lipoxygenase, PLAT/LH2 domain	GO:0046872,GO:0016702,GO:0016491,GO:0005515,GO:0005737,GO:0006629,GO:0006631,GO:0006633,GO:0051213,GO:1990136,GO:0031408,GO:0034440	metal ion binding,oxidoreductase activity, acting on single donors with incorporation of molecular oxygen, incorporation of two atoms of oxygen,oxidoreductase activity,protein binding,cytoplasm,lipid metabolic process,fatty acid metabolic process,fatty acid biosynthetic process,dioxygenase activity,linoleate 9S-lipoxygenase activity,oxylipin biosynthetic process,lipid oxidation	7.8687	2.97612	0.000208219
43	Psat0s1953g0120	AT3G06490,AT2G47190,AT5G49620	MYB108,MYB2,MYB78	7.84256	2.97133	0.000879337	IPR001005,IPR009057,IPR017930,IPR044676	SANT/Myb,Homeobox-like_sf,Myb_dom,EOBI/EOBII-like_plant	SANT/Myb domain,Homeobox-like domain superfamily,Myb domain,MYB-like transcription factor EOBI/EOBII-like, plant	GO:0003700,GO:0006355,GO:0043565	DNA-binding transcription factor activity,regulation of DNA-templated transcription,sequence-specific DNA binding	7.84256	2.97133	0.000879337
44	Psat6g108120			7.8371	2.97032	1.73731e-05	IPR000727,IPR006011,IPR006012,IPR010989,IPR045242	T_SNARE_dom,Syntaxin_N,Syntaxin/epimorphin_CS,SNARE,Syntaxin	Target SNARE coiled-coil homology domain,Syntaxin, N-terminal domain,Syntaxin/epimorphin, conserved site,SNARE,Syntaxin	GO:0006886,GO:0016020,GO:0016192,GO:0005484	intracellular protein transport,membrane,vesicle-mediated transport,SNAP receptor activity	7.8371	2.97032	1.73731e-05
45	Psat4g117800			7.73602	2.95159	0.00516783	IPR008250	ATPase_P-typ_transduc_dom_A_sf	P-type ATPase, A domain superfamily			7.73602	2.95159	0.00516783
46	Psat6g097080			7.69575	2.94406	5.58324e-05	IPR001019,IPR011025,IPR027417	Gprotein_alpha_su,GproteinA_insert,P-loop_NTPase	Guanine nucleotide binding protein (G-protein), alpha subunit,G protein alpha subunit, helical insertion,P-loop containing nucleoside triphosphate hydrolase	GO:0003924,GO:0007165,GO:0007186,GO:0019001,GO:0031683	GTPase activity,signal transduction,G protein-coupled receptor signaling pathway,guanyl nucleotide binding,G-protein beta/gamma-subunit complex binding	7.69575	2.94406	5.58324e-05
47	Psat0s6176g0040			7.2697	2.8619	0.00130234	IPR000528,IPR016140,IPR036312	Plant_nsLTP,Bifunc_inhib/LTP/seed_store,Bifun_inhib/LTP/seed_sf	Plant non-specific lipid-transfer protein/Par allergen,Bifunctional inhibitor/plant lipid transfer protein/seed storage helical domain,Bifunctional inhibitor/plant lipid transfer protein/seed storage helical domain superfamily	GO:0008289,GO:0006869	lipid binding,lipid transport	7.2697	2.8619	0.00130234
48	Psat0s66g0240	AT4G11521	AT4G11521	6.89074	2.78466	0.000531881	IPR002902,IPR038408	GNK2,GNK2_sf	Gnk2-homologous domain,Gnk2-homologous domain superfamily			6.89074	2.78466	0.000531881
49	Psat5g048000	AT1G35515,AT4G09460	HOS10,MYB6	6.82047	2.76987	1.67591e-05	IPR001005,IPR009057,IPR017930	SANT/Myb,Homeobox-like_sf,Myb_dom	SANT/Myb domain,Homeobox-like domain superfamily,Myb domain			6.82047	2.76987	1.67591e-05
50	Psat7g205080			6.74845	2.75456	0.000308486	IPR001356,IPR006563,IPR008422,IPR009057	Homeobox_dom,POX_dom,Homeobox_KN_domain,Homeobox-like_sf	Homeobox domain,POX domain,Homeobox KN domain,Homeobox-like domain superfamily	GO:0003677,GO:0006355	DNA binding,regulation of DNA-templated transcription	6.74845	2.75456	0.000308486
51	Psat6g002880	AT1G75750,AT2G18420	GASA1,AT2G18420	6.52807	2.70666	0.00165226	IPR003854	GASA	Gibberellin regulated protein			6.52807	2.70666	0.00165226
52	Psat6g159880			6.49076	2.69839	6.10657e-05	IPR001005,IPR009057,IPR017930,IPR044676	SANT/Myb,Homeobox-like_sf,Myb_dom,EOBI/EOBII-like_plant	SANT/Myb domain,Homeobox-like domain superfamily,Myb domain,MYB-like transcription factor EOBI/EOBII-like, plant	GO:0003700,GO:0006355,GO:0043565	DNA-binding transcription factor activity,regulation of DNA-templated transcription,sequence-specific DNA binding	6.49076	2.69839	6.10657e-05
53	Psat4g184760			6.4856	2.69724	0.000125064	IPR000907,IPR001024,IPR001246,IPR013819,IPR020833,IPR020834,IPR027433,IPR036226,IPR036392,IPR042057	LipOase,PLAT/LH2_dom,LipOase_plant,LipOase_C,LipOase_Fe_BS,LipOase_CS,Lipoxygenase_dom_3,LipOase_C_sf,PLAT/LH2_dom_sf,Lipoxy_PLAT/LH2	Lipoxygenase,PLAT/LH2 domain,Lipoxygenase, plant,Lipoxygenase, C-terminal,Lipoxygenase, iron binding site,Lipoxygenase, conserved site,Lipoxygenase, domain 3,Lipoxigenase, C-terminal domain superfamily,PLAT/LH2 domain superfamily,Plant lipoxygenase, PLAT/LH2 domain	GO:0046872,GO:0016702,GO:0016491,GO:0005515,GO:0034440	metal ion binding,oxidoreductase activity, acting on single donors with incorporation of molecular oxygen, incorporation of two atoms of oxygen,oxidoreductase activity,protein binding,lipid oxidation	6.4856	2.69724	0.000125064
54	Psat4g209680	AT2G32020,AT2G32030	AT2G32020,AT2G32030	6.46745	2.6932	4.24492e-05	IPR000182,IPR016181	GNAT_dom,Acyl_CoA_acyltransferase	GNAT domain,Acyl-CoA N-acyltransferase	GO:0016747	acyltransferase activity, transferring groups other than amino-acyl groups	6.46745	2.6932	4.24492e-05
55	Psat1g221320	AT4G22200	KT2/3	6.14444	2.61928	7.47983e-05	IPR000595,IPR003938,IPR005821,IPR014710,IPR018490,IPR045319,IPR002110,IPR021789,IPR036770	cNMP-bd_dom,K_chnl_volt-dep_EAG/ELK/ERG,Ion_trans_dom,RmlC-like_jellyroll,cNMP-bd-like,KAT/AKT,Ankyrin_rpt,KHA_dom,Ankyrin_rpt-contain_sf	Cyclic nucleotide-binding domain,Potassium channel, voltage-dependent, EAG/ELK/ERG,Ion transport domain,RmlC-like jelly roll fold,Cyclic nucleotide-binding-like,Potassium channel KAT/AKT,Ankyrin repeat,KHA domain,Ankyrin repeat-containing domain superfamily	GO:0016020,GO:0055085,GO:0006813,GO:0005249,GO:0006811,GO:0005216,GO:0005515	membrane,transmembrane transport,potassium ion transport,voltage-gated potassium channel activity,ion transport,ion channel activity,protein binding	6.14444	2.61928	7.47983e-05
56	Psat4g178040			5.76913	2.52835	8.00557e-05	IPR003441,IPR036093	NAC-dom,NAC_dom_sf	NAC domain,NAC domain superfamily	GO:0003677,GO:0006355	DNA binding,regulation of DNA-templated transcription	5.76913	2.52835	8.00557e-05
57	Psat7g139120	AT4G38970,AT2G21330	FBA2,FBA1	5.33739	2.41614	9.35671e-06	IPR000741,IPR013785	FBA_I,Aldolase_TIM	Fructose-bisphosphate aldolase, class-I,Aldolase-type TIM barrel	GO:0006096,GO:0004332,GO:0009507,GO:0009536,GO:0016829	glycolytic process,fructose-bisphosphate aldolase activity,chloroplast,plastid,lyase activity	5.33739	2.41614	9.35671e-06
58	Psat0s4366g0040			5.09453	2.34895	4.39204e-05	IPR000907,IPR001024,IPR001246,IPR013819,IPR020834,IPR027433,IPR036226,IPR036392	LipOase,PLAT/LH2_dom,LipOase_plant,LipOase_C,LipOase_CS,Lipoxygenase_dom_3,LipOase_C_sf,PLAT/LH2_dom_sf	Lipoxygenase,PLAT/LH2 domain,Lipoxygenase, plant,Lipoxygenase, C-terminal,Lipoxygenase, conserved site,Lipoxygenase, domain 3,Lipoxigenase, C-terminal domain superfamily,PLAT/LH2 domain superfamily	GO:0046872,GO:0016702,GO:0016491,GO:0005515,GO:0034440	metal ion binding,oxidoreductase activity, acting on single donors with incorporation of molecular oxygen, incorporation of two atoms of oxygen,oxidoreductase activity,protein binding,lipid oxidation	5.09453	2.34895	4.39204e-05
59	Psat3g028840			5.03586	2.33224	0.000149975	IPR000727,IPR006011,IPR006012,IPR010989,IPR045242	T_SNARE_dom,Syntaxin_N,Syntaxin/epimorphin_CS,SNARE,Syntaxin	Target SNARE coiled-coil homology domain,Syntaxin, N-terminal domain,Syntaxin/epimorphin, conserved site,SNARE,Syntaxin	GO:0006886,GO:0016020,GO:0016192,GO:0005484	intracellular protein transport,membrane,vesicle-mediated transport,SNAP receptor activity	5.03586	2.33224	0.000149975
60	Psat4g078320	AT4G18010	IP5PII	5.03145	2.33098	0.000251779	IPR036691,IPR045849,IPR000300	Endo/exonu/phosph_ase_sf,IP5P_plant,IPPc	Endonuclease/exonuclease/phosphatase superfamily,Inositol polyphosphate 5-phosphatase, plant,Inositol polyphosphate-related phosphatase	GO:0004445,GO:0016791,GO:0046856	inositol-polyphosphate 5-phosphatase activity,phosphatase activity,phosphatidylinositol dephosphorylation	5.03145	2.33098	0.000251779
61	Psat6g211800			4.97376	2.31434	7.11386e-06	IPR000719,IPR002902,IPR008271,IPR011009,IPR017441,IPR038408,IPR001245	Prot_kinase_dom,GNK2,Ser/Thr_kinase_AS,Kinase-like_dom_sf,Protein_kinase_ATP_BS,GNK2_sf,Ser-Thr/Tyr_kinase_cat_dom	Protein kinase domain,Gnk2-homologous domain,Serine/threonine-protein kinase, active site,Protein kinase-like domain superfamily,Protein kinase, ATP binding site,Gnk2-homologous domain superfamily,Serine-threonine/tyrosine-protein kinase, catalytic domain	GO:0004672,GO:0005524,GO:0006468	protein kinase activity,ATP binding,protein phosphorylation	4.97376	2.31434	7.11386e-06
62	Psat7g227200	AT5G59310,AT3G51600,AT2G38530,AT2G15050,AT5G59320,AT2G38540,AT3G51590	LTP4,LTP5,LTP2,LTP,LTP3,LP1,LTP12	4.69466	2.23102	2.98818e-05	IPR000528,IPR016140,IPR036312	Plant_nsLTP,Bifunc_inhib/LTP/seed_store,Bifun_inhib/LTP/seed_sf	Plant non-specific lipid-transfer protein/Par allergen,Bifunctional inhibitor/plant lipid transfer protein/seed storage helical domain,Bifunctional inhibitor/plant lipid transfer protein/seed storage helical domain superfamily	GO:0008289,GO:0006869	lipid binding,lipid transport	4.69466	2.23102	2.98818e-05
63	Psat6g199400	AT5G52300,AT4G25580	LTI65,AT4G25580	4.47306	2.16126	4.62838e-05	IPR037491	LTI78/LTI65	Low-temperature-induced 78kDa/65kDa	GO:0009737	response to abscisic acid	4.47306	2.16126	4.62838e-05
64	Psat0s189g0080			4.43136	2.14775	1.74557e-05	IPR001356,IPR006563,IPR008422,IPR009057	Homeobox_dom,POX_dom,Homeobox_KN_domain,Homeobox-like_sf	Homeobox domain,POX domain,Homeobox KN domain,Homeobox-like domain superfamily	GO:0003677,GO:0006355	DNA binding,regulation of DNA-templated transcription	4.43136	2.14775	1.74557e-05
65	Psat4g117960	AT4G17880,AT5G46760,AT5G46830,AT1G32640	MYC4,MYC3,NIG1,MYC2	4.36546	2.12613	0.000104289	IPR011598,IPR025610,IPR036638,IPR045084	bHLH_dom,MYC/MYB_N,HLH_DNA-bd_sf,AIB/MYC-like	Myc-type, basic helix-loop-helix (bHLH) domain,Transcription factor MYC/MYB N-terminal,Helix-loop-helix DNA-binding domain superfamily,Transcription factor AIB/MYC-like	GO:0003700,GO:0046983,GO:0006355	DNA-binding transcription factor activity,protein dimerization activity,regulation of DNA-templated transcription	4.36546	2.12613	0.000104289
66	Psat0s2012g0280	AT1G48260,AT3G17510	CIPK17,CIPK1	4.3576	2.12353	7.84525e-05	IPR000719,IPR004041,IPR008271,IPR011009,IPR018451,IPR028375	Prot_kinase_dom,NAF_dom,Ser/Thr_kinase_AS,Kinase-like_dom_sf,NAF/FISL_domain,KA1/Ssp2_C	Protein kinase domain,NAF domain,Serine/threonine-protein kinase, active site,Protein kinase-like domain superfamily,NAF/FISL domain,KA1 domain/Ssp2, C-terminal	GO:0004672,GO:0005524,GO:0007165,GO:0006468	protein kinase activity,ATP binding,signal transduction,protein phosphorylation	4.3576	2.12353	7.84525e-05
67	Psat7g159760			4.30785	2.10697	0.000134941	IPR001005,IPR009057,IPR017930	SANT/Myb,Homeobox-like_sf,Myb_dom	SANT/Myb domain,Homeobox-like domain superfamily,Myb domain			4.30785	2.10697	0.000134941
68	Psat7g017080			4.20335	2.07154	1.36565e-05	IPR000222,IPR001932,IPR015655,IPR036457	PP2C_BS,PPM-type_phosphatase_dom,PP2C,PPM-type_dom_sf	PPM-type phosphatase, divalent cation binding,PPM-type phosphatase domain,Protein phosphatase 2C family,PPM-type phosphatase domain superfamily	GO:0043169,GO:0004722,GO:0006470	cation binding,protein serine/threonine phosphatase activity,protein dephosphorylation	4.20335	2.07154	1.36565e-05
69	Psat4g181720			4.10266	2.03656	0.00391266	IPR004873,IPR044816	BURP_dom,BURP	BURP domain,BURP domain-containing protein			4.10266	2.03656	0.00391266
70	Psat1g209120			4.07702	2.02751	7.75386e-05	IPR001005,IPR009057,IPR017930	SANT/Myb,Homeobox-like_sf,Myb_dom	SANT/Myb domain,Homeobox-like domain superfamily,Myb domain			4.07702	2.02751	7.75386e-05

## Sheet: Table S2
Table S2. The ABA-dependent genes of P. sativum seeds selected for analysis of DNA methylation in the promoters.
Genes	CDS	P. sativum v1a genome localization	GenBank
PsABI3	Psat3g142040	chr3LG5:276108598..276112651 (+ strand) 4,054 bp	-
PsABI4	Psat2g031240	chr2LG1:43747338..43748327 (+ strand)	-
PsABI5	Psat3g033680	chr3LG5:69890003..69891538 (- strand) 1,536 bp	-

## Sheet: Tables S3
Table S4. Primers used for amplification of gene promoter regions from bisulfite-treated DNA isolated from embryonic axes of P.sativum.
Y - C/T, R - G/A.
Gene	Analyzed length, bp	Forward primer (5′→3′)	Reverse primer (5′→3′)	PCR product length, bp
PsABI3	1085	GTGGTAAGTAATGTAATAAATYTAAAGG	TAATTTTCTCTTTCTTARATAARTTCAAAA	283
		TTTTGAAYTTATYTAAGAAAGAGAAAATTA	TATCAAACATTAAACACCCCTATAC	384
		TAAAATTTTGATTTTTTTTTGGTTTTGATAATAG	TCAAAARAARATAARATTCTTTAAAATCCTATAAAT	315
		GAGGGTTTTYATTATTAATAATTTAATATATTTTATG	TCTTCTTCTCTTTCATTCACCATC	357
PsABI4	721	ATTGATATGTGTTAGTYYAATGAGTTGT	CTCRTTCARTRTTATTRTTTRTRTTTTACTA	431
		TTAGGGGTAATAYAAATATYTAGTTTAGTT	CAACCCATTTACCCCAACTAC	557
PsABI5	1231	TAGTTTAATAGTGTGTTTGGTTGAG	CCTTAATTCTAATACATCTTTTATTCA	454
		TTAAATATTATYTAGYTTTTGAATAAATTATTTGT	CTTAACTATRTCACACTCATTCAT	313
		TGAATAAAAGATGTATTAGAATTAAGG	CCTTAACAAATRTTARATTCCTTTRTCA	426
		AATAYATGAYAGAAGYAAAATGGYTGTA	CACTTTCACATARACTATRCTRAAACT	482

## Sheet: Table S4
Table S3. Functions of transcription factors, binding sites of which were identified in gene promoter regions PsABI3, PsABI4 и PsABI5.
Name	Function	Gene	Reference
ABSCISIC acid response element binding factor 1 (ABF1)	Key protein of the cell cycle. It is expressed in trichomes of young leaves and constitutively in cotyledons, roots, leaves, and flowers. Expression is induced by exposure to ABC, cold, and heat	PsABI3 – 4	Song, L.; Huang, S.C.; Wise, A.; Castanon, R.; Nery, J.R.; Chen, H.; Watanabe, M.; Thomas, J.; Bar-Joseph, Z.; Ecker, J.R. A transcription factor hierarchy defines an environmental stress response network. Science (80-. ). 2016, 354, doi:10.1126/science.aag1550.
		PsABI4 – 3
		PsABI5 – 10
Abscisic acid response element binding factor 3 (ABF3)	Participates in the transmission of ABA signals and the response to salt stress	PsABI3 – 3	Song, L.; Huang, S.C.; Wise, A.; Castanon, R.; Nery, J.R.; Chen, H.; Watanabe, M.; Thomas, J.; Bar-Joseph, Z.; Ecker, J.R. A transcription factor hierarchy defines an environmental stress response network. Science (80-. ). 2016, 354, doi:10.1126/science.aag1550.
		PsABI4 – 2
		PsABI5 – 5
Abscisic acid response element binding factor 4 (ABF4)	Participates in the transmission of ABA signals and the response to salt stress. The main transcription factor involved in drought tolerance	PsABI3 – 11	Song, L.; Huang, S.C.; Wise, A.; Castanon, R.; Nery, J.R.; Chen, H.; Watanabe, M.; Thomas, J.; Bar-Joseph, Z.; Ecker, J.R. A transcription factor hierarchy defines an environmental stress response network. Science (80-. ). 2016, 354, doi:10.1126/science.aag1550.
		PsABI4 – 3
		PsABI5 – 8
ABA-Insensitive 5 (ABI5)	Involved in the transmission of ABA signals during seed maturation and germination	PsABI3 – 0	O’Malley, R.C.; Huang, S.C.; Song, L.; Lewsey, M.G.; Bartlett, A.; Nery, J.R.; Galli, M.; Gallavotti, A.; Ecker, J.R. Cistrome and Epicistrome Features Shape the Regulatory DNA Landscape. Cell 2016, 165, 1280–1292, doi:10.1016/j.cell.2016.04.038.
		PsABI4 – 1
		PsABI5 – 5
NAC DOMAIN CONTAINING PROTEIN 102 (ANAC102)	Mediating the response to hypoxia in seedlings	PsABI3 – 12	Song, L.; Huang, S.C.; Wise, A.; Castanon, R.; Nery, J.R.; Chen, H.; Watanabe, M.; Thomas, J.; Bar-Joseph, Z.; Ecker, J.R. A transcription factor hierarchy defines an environmental stress response network. Science (80-. ). 2016, 354, doi:10.1126/science.aag1550.
		PsABI4 – 2
		PsABI5 – 12
DIVARICATA2 (DIV2, AT5G04760)	Negative regulator in salt stress, necessary for the transmission of ABA signals	PsABI3 – 3	Song, L.; Huang, S.C.; Wise, A.; Castanon, R.; Nery, J.R.; Chen, H.; Watanabe, M.; Thomas, J.; Bar-Joseph, Z.; Ecker, J.R. A transcription factor hierarchy defines an environmental stress response network. Science (80-. ). 2016, 354, doi:10.1126/science.aag1550.
		PsABI4 – 0
		PsABI5 – 2
Dehydration-responsive element binding protein 2 (DREB2A)	Negative regulator in salt stress, necessary for the transmission of ABA signals. Specifically binds to DRE/CRT cis-elements (drought and low-temperature stress response). Regulates the expression of many genes induced by water stress	PsABI3 – 2	Song, L.; Huang, S.C.; Wise, A.; Castanon, R.; Nery, J.R.; Chen, H.; Watanabe, M.; Thomas, J.; Bar-Joseph, Z.; Ecker, J.R. A transcription factor hierarchy defines an environmental stress response network. Science (80-. ). 2016, 354, doi:10.1126/science.aag1550.
		PsABI4 – 3
		PsABI5 – 7
G-box binding factor 2 (GBF2)	Binds to the G-box regulatory element, found in many plant promoters	PsABI3 – 3	Song, L.; Huang, S.C.; Wise, A.; Castanon, R.; Nery, J.R.; Chen, H.; Watanabe, M.; Thomas, J.; Bar-Joseph, Z.; Ecker, J.R. A transcription factor hierarchy defines an environmental stress response network. Science (80-. ). 2016, 354, doi:10.1126/science.aag1550.
		PsABI4 – 2
		PsABI5 – 8
G-box binding factor 3 (GBF3)	Binds to the G-box regulatory element and is induced by cold and water deprivation. It is mainly expressed in roots and leaves growing in darkness	PsABI3 – 6	Song, L.; Huang, S.C.; Wise, A.; Castanon, R.; Nery, J.R.; Chen, H.; Watanabe, M.; Thomas, J.; Bar-Joseph, Z.; Ecker, J.R. A transcription factor hierarchy defines an environmental stress response network. Science (80-. ). 2016, 354, doi:10.1126/science.aag1550.
		PsABI4 – 3
		PsABI5 – 10
Homeobox-leucine zipper protein 22 (HAT22)	Transmits the signaling ABA-induced growth inhibition and drought-induced aging	PsABI3 – 5	Song, L.; Huang, S.C.; Wise, A.; Castanon, R.; Nery, J.R.; Chen, H.; Watanabe, M.; Thomas, J.; Bar-Joseph, Z.; Ecker, J.R. A transcription factor hierarchy defines an environmental stress response network. Science (80-. ). 2016, 354, doi:10.1126/science.aag1550.
		PsABI4 – 2
		PsABI5 – 5
Homeobox protein 5 (HB5)	Mediates the inhibitory effect of ABA on growth during germination	PsABI3 – 2	Song, L.; Huang, S.C.; Wise, A.; Castanon, R.; Nery, J.R.; Chen, H.; Watanabe, M.; Thomas, J.; Bar-Joseph, Z.; Ecker, J.R. A transcription factor hierarchy defines an environmental stress response network. Science (80-. ). 2016, 354, doi:10.1126/science.aag1550.
		PsABI4 – 1
		PsABI5 – 3
Homeobox protein 6 (HB6)	Regulates hormonal responses	PsABI3 – 0	Song, L.; Huang, S.C.; Wise, A.; Castanon, R.; Nery, J.R.; Chen, H.; Watanabe, M.; Thomas, J.; Bar-Joseph, Z.; Ecker, J.R. A transcription factor hierarchy defines an environmental stress response network. Science (80-. ). 2016, 354, doi:10.1126/science.aag1550.
		PsABI4 – 6
		PsABI5 – 5
Homeobox protein 7 (HB7)	Regulated in an ABA-dependent manner and can act in the signal transduction pathway that mediates the response to drought	PsABI3 – 4	Song, L.; Huang, S.C.; Wise, A.; Castanon, R.; Nery, J.R.; Chen, H.; Watanabe, M.; Thomas, J.; Bar-Joseph, Z.; Ecker, J.R. A transcription factor hierarchy defines an environmental stress response network. Science (80-. ). 2016, 354, doi:10.1126/science.aag1550.
		PsABI4 – 0
		PsABI5 – 1
KANADI 1 (KAN1)	Regulates organ polarity in Arabidopsis	PsABI3 – 8	Merelo, P.; Xie, Y.; Brand, L.; Ott, F.; Weigel, D.; Bowman, J.L.; Heisler, M.G.; Wenkel, S. Genome-Wide Identification of KANADI1 Target Genes. PLoS One 2013, 8, e77341, doi:10.1371/journal.pone.0077341.
		PsABI4 – 1
		PsABI5 – 5
Leafy cotyledon 1 (LEC1)	Regulates the transcription of genes required for embryo maturation and cell differentiation	PsABI3 – 1	O’Malley, R.C.; Huang, S.C.; Song, L.; Lewsey, M.G.; Bartlett, A.; Nery, J.R.; Galli, M.; Gallavotti, A.; Ecker, J.R. Cistrome and Epicistrome Features Shape the Regulatory DNA Landscape. Cell 2016, 165, 1280–1292, doi:10.1016/j.cell.2016.04.038.
		PsABI4 – 2
		PsABI5 – 5
Nuclear transcription factor Y subunit B-2 (NFYB2)	Involved in regulating the response to nutrient levels	PsABI3 – 8	Song, L.; Huang, S.C.; Wise, A.; Castanon, R.; Nery, J.R.; Chen, H.; Watanabe, M.; Thomas, J.; Bar-Joseph, Z.; Ecker, J.R. A transcription factor hierarchy defines an environmental stress response network. Science (80-. ). 2016, 354, doi:10.1126/science.aag1550.
		PsABI4 – 9
		PsABI5 – 7
Repressor of GA (RGA)	Involved in regulating the response to nutrient levels. The repressor of the gibberellin signaling pathway, which stimulates plant growth	PsABI3 – 5	Serrano-Mislata, A.; Bencivenga, S.; Bush, M.; Schiessl, K.; Boden, S.; Sablowski, R. DELLA genes restrict inflorescence meristem function independently of plant height. Nat. Plants 2017, 3, 749–754, doi:10.1038/s41477-017-0003-y
		PsABI4 – 1
		PsABI5 – 5
